# Supplementary material for: Expansion of the Protein Repertoire in Newly Explored Environments: Human Gut Microbiome Specific Protein Families
Source: PLoS Comput Biol. 2010 Jun 3;6(6):e1000798. doi: 10.1371/journal.pcbi.1000798 (PMC2880560; doi:10.1371/journal.pcbi.1000798)
Supplement: Table S2 — The list of genomes in the human gut-related (HGR) and human gut-unrelated (HGU) sets. (0.07 MB XLS) [file pcbi.1000798.s002.xls]

## Sheet: HGR Genomes
Human gut-related organisms (HGR set)	TaxonID	Protein Count
Bifidobacterium adolescentis ATCC 15703	367928	1631
Bifidobacterium longum NCC2705	206672	1729
Lactobacillus gasseri ATCC 33323	324831	1755
Lactobacillus johnsonii NCC 533	257314	1821
Bifidobacterium longum DJO10A	205913	1990
Akkermansia muciniphila ATCC BAA-835	349741	2138
Lactobacillus casei ATCC 334	321967	2771
Lactobacillus casei BL23	543734	3044
Lactobacillus plantarum WCFS1	220668	3057
Parabacteroides distasonis ATCC 8503	435591	3850
Collinsella intestinalis DSM 13280	521003	3998
Bacteroides vulgatus ATCC 8482	435590	4065
Escherichia coli str. K12 substr. MG1655	511145	4132
Escherichia coli ATCC 8739	481805	4200
Bacteroides fragilis NCTC 9343	272559	4231
Actinomyces odontolyticus ATCC 17982	411466	4322
Escherichia coli HS	331112	4378
Bacteroides fragilis YCH46	295405	4625
Collinsella aerofaciens ATCC 25986	411903	4734
Bacteroides thetaiotaomicron VPI-5482	226186	4816
Bifidobacterium dentium ATCC 27678	473819	4860
Escherichia coli SMS-3-5	439855	4913
Escherichia coli SE11	409438	5002
Parvimonas micra ATCC 33270	411465	5034
Escherichia coli O157:H7 str. EC4115	444450	5477
Anaerofustis stercorihominis DSM 17244	445971	5680
Streptococcus infantarius subsp. infantarius ATCC BAA-102	471872	6153
Dorea formicigenerans ATCC 27755	411461	6554
Clostridium hiranonis DSM 13275	500633	6813
Alistipes putredinis DSM 17216	445970	6920
Eubacterium dolichum DSM 3991	428127	7050
Bifidobacterium adolescentis L2-32	411481	7284
Clostridium spiroforme DSM 1552	428126	7395
Clostridium sporogenes ATCC 15579	471871	7534
Collinsella stercoris DSM 13279	445975	7587
Bacteroides caccae ATCC 43185	411901	7710
Ruminococcus gnavus ATCC 29149	411470	7826
Eubacterium siraeum DSM 15702	428128	8109
Ruminococcus lactaris ATCC 29176	471875	8250
Clostridium bartlettii DSM 16795	445973	8361
Eubacterium ventriosum ATCC 27560	411463	8406
Ruminococcus torques ATCC 27756	411460	8625
Clostridium sp. L2-50	411489	8847
Dorea longicatena DSM 13814	411462	8910
Coprococcus eutactus ATCC 27759	411474	8946
Clostridium sp. SS2/1	411484	9501
Clostridium ramosum DSM 1402	445974	9507
Bacteroides capillosus ATCC 29799	411467	9666
Bacteroides intestinalis DSM 17393	471870	9822
Faecalibacterium prausnitzii M21/2	411485	10479
Anaerostipes caccae DSM 14662	411490	11244
Enterobacter cancerogenus ATCC 35316	500639	11299
Bacteroides stercoris ATCC 43183	449673	11331
Clostridium leptum DSM 753	428125	11769
Bacteroides plebeius DSM 17135	484018	11797
Providencia stuartii ATCC 25827	471874	11905
Clostridium scindens ATCC 35704	411468	11985
Ruminococcus obeum ATCC 29174	411459	12525
Clostridium nexile DSM 1787	500632	12615
Bacteroides coprocola DSM 17136	470145	12873
Parabacteroides merdae ATCC 43184	411477	13150
Anaerotruncus colihominis DSM 17241	445972	13281
Bacteroides uniformis ATCC 8492	411479	13989
Bacteroides ovatus ATCC 8483	411476	15602
Clostridium bolteae ATCC BAA-613	411902	21852

## Sheet: HGU Genomes
Human gut-unrelated organisms (HGU set)	TaxonID	Protein Count
Candidatus Carsonella ruddii PV	387662	182
Candidatus Sulcia muelleri GWSS	444179	227
Lactobacillus salivarius UCC118	362948	300
Buchnera aphidicola str. Cc (Cinara cedri)	372461	357
Mycoplasma genitalium G37	243273	477
Candidatus Phytoplasma mali	37692	479
Buchnera aphidicola str. Bp (Baizongia pistaciae)	224915	507
Nanoarchaeum equitans Kin4-M	228908	536
Buchnera aphidicola str. Sg (Schizaphis graminum)	198804	546
Buchnera aphidicola str. APS (Acyrthosiphon pisum)	107806	574
Candidatus Blochmannia floridanus	203907	583
Baumannia cicadellinicola str. Hc (Homalodisca coagulata)	374463	595
Ureaplasma parvum serovar 3 str. ATCC 27815	505682	609
Candidatus Blochmannia pennsylvanicus str. BPEN	291272	610
Ureaplasma parvum serovar 3 str. ATCC 700970	273119	614
Wigglesworthia glossinidia endosymbiont of Glossina brevipalpis	36870	617
Mycoplasma arthritidis 158L3-1	243272	631
Mycoplasma mobile 163K	267748	633
Ureaplasma urealyticum serovar 10 str. ATCC 33699	565575	646
Mycoplasma hyopneumoniae 7448	262722	663
Mycoplasma hyopneumoniae J	262719	665
Mycoplasma synoviae 53	262723	672
Mesoplasma florum L1	265311	682
Candidatus Phytoplasma australiense	59748	684
Mycoplasma pneumoniae M129	272634	689
Mycoplasma hyopneumoniae 232	295358	691
Aster yellows witches'-broom phytoplasma AYWB	322098	693
Mycoplasma gallisepticum R	233150	726
Mycoplasma agalactiae PG2	347257	742
Onion yellows phytoplasma OY-M	262768	754
Mycoplasma pulmonis UAB CTIP	272635	782
Tropheryma whipplei TW08/27	218496	783
Wolbachia endosymbiont strain TRS of Brugia malayi	292805	805
Tropheryma whipplei str. Twist	203267	808
Mycoplasma capricolum subsp. capricolum ATCC 27343	340047	812
Borrelia turicatae 91E135	314724	818
Borrelia hermsii DAH	314723	819
Rickettsia prowazekii str. Madrid E	272947	835
Rickettsia typhi str. Wilmington	257363	838
Chlamydia trachomatis 434/Bu	471472	874
Chlamydia trachomatis L2b/UCH-1/proctitis	471473	874
Chlamydia trachomatis D/UW-3/CX	272561	895
Chlamydia muridarum Nigg	243161	911
Chlamydia trachomatis A/HAR-13	315277	919
Ehrlichia canis str. Jake	269484	925
Chlamydophila abortus S26/3	218497	932
Neorickettsia sennetsu str. Miyayama	222891	932
Borrelia garinii PBi	290434	932
Candidatus Vesicomyosocius okutanii HA (Candidatus Vesicomyosocius	412965	937
Anaplasma marginale str. St. Maries	234826	949
Ehrlichia ruminantium str. Gardel	302409	950
Candidatus Ruthia magnifica str. Cm (Calyptogena magnifica)	413404	976
Rickettsia massiliae MTU5	416276	980
Borrelia recurrentis A1	412418	990
Chlamydophila caviae GPIC	227941	1005
Chlamydophila felis Fe/C-56	264202	1013
Mycoplasma mycoides subsp. mycoides SC str. PG1	272632	1016
Treponema pallidum subsp. pallidum SS14	455434	1028
Treponema pallidum subsp. pallidum str. Nichols	243276	1036
Mycoplasma penetrans HF-2	272633	1037
Chlamydophila pneumoniae CWL029	115713	1052
Chlamydophila pneumoniae J138	138677	1069
Rickettsia canadensis str. McKiel	293613	1093
Ehrlichia chaffeensis str. Arkansas	205920	1105
Chlamydophila pneumoniae AR39	115711	1112
Chlamydophila pneumoniae TW-183	182082	1113
Bartonella quintana str. Toulouse	283165	1142
Orientia tsutsugamushi str. Boryong	357244	1182
Wolbachia endosymbiont of Drosophila melanogaster	163164	1195
Borrelia afzelii PKo	390236	1214
Rickettsia akari str. Hartford	293614	1259
Anaplasma phagocytophilum HZ	212042	1264
Wolbachia pipientis	955	1275
Dichelobacter nodosus VCS1703A	246195	1280
Candidatus Amoebophilus asiaticus 5a2	452471	1283
Borrelia duttonii Ly	412419	1305
Lawsonia intracellularis PHE/MN1-00	363253	1337
Rickettsia rickettsii str. 'Sheila Smith'	392021	1345
Candidatus Pelagibacter ubique HTCC1062	335992	1354
Dehalococcoides sp. BAV1	216389	1371
Rickettsia conorii str. Malish 7	272944	1374
Acholeplasma laidlawii PG-8A	441768	1380
Rickettsia rickettsii str. Iowa	452659	1384
Francisella tularensis subsp. mediasiatica FSC147	441952	1406
Rickettsia bellii RML369-C	336407	1429
Ignicoccus hospitalis KIN4/I	453591	1434
Dehalococcoides sp. CBDB1	255470	1458
Rickettsia bellii OSU 85-389	391896	1476
Thermoplasma acidophilum DSM 1728	273075	1482
Coprothermobacter proteolyticus DSM 5265	309798	1482
Bartonella henselae str. Houston-1	283166	1488
Helicobacter pylori J99	85963	1489
Methanococcus aeolicus Nankai-3	419665	1490
Thermoplasma volcanium GSS1	273116	1499
Helicobacter pylori G27	563041	1504
Polynucleobacter necessarius STIR1	452638	1508
Rickettsia felis URRWXCal2	315456	1512
Elusimicrobium minutum Pei191	445932	1529
Methanosphaera stadtmanae DSM 3091	339860	1534
Picrophilus torridus DSM 9790	263820	1535
Helicobacter pylori HPAG1	357544	1544
Francisella tularensis subsp. holarctica OSU18	393011	1555
Aquifex aeolicus VF5	224324	1560
Lactobacillus delbrueckii subsp. bulgaricus ATCC 11842	390333	1562
Helicobacter pylori Shi470	512562	1569
Staphylothermus marinus F1	399550	1570
Helicobacter pylori 26695	85962	1576
Dehalococcoides ethenogenes 195	243164	1580
Francisella tularensis subsp. holarctica FTNF002-00	458234	1580
Candidatus Korarchaeum cryptofilum OPF8	374847	1602
Hyperthermus butylicus DSM 5456	415426	1602
Francisella tularensis subsp. tularensis SCHU S4	177416	1603
Mycobacterium leprae TN	272631	1605
Francisella tularensis subsp. tularensis FSC198	393115	1605
Lactobacillus helveticus DPC 4571	405566	1610
Helicobacter acinonychis str. Sheeba	382638	1618
Campylobacter jejuni subsp. jejuni 81116	407148	1626
Hydrogenobaculum sp. Y04AAS1	380749	1629
Campylobacter jejuni subsp. jejuni NCTC 11168	192222	1634
Francisella tularensis subsp. tularensis WY96-3418	418136	1634
Borrelia burgdorferi B31	224326	1640
Methanococcus vannielii SB	406327	1678
Methanopyrus kandleri AV19	190192	1687
Oenococcus oeni PSU-1	203123	1691
Methanosaeta thermophila PT (Methanothrix thermophila PT)	349307	1696
Aeropyrum pernix K1	272557	1700
Prochlorococcus marinus subsp. pastoris str. CCMP1986	59919	1717
Francisella novicida U112	401614	1719
Lactobacillus delbrueckii subsp. bulgaricus ATCC BAA-365	321956	1721
Sulfurihydrogenibium sp. YO3AOP1	436114	1721
Methanococcus maripaludis S2	267377	1722
Campylobacter jejuni subsp. doylei 269.97	360109	1731
Methanocorpusculum labreanum Z	410358	1739
Fervidobacterium nodosum Rt17-B1	381764	1750
Chlorobium phaeovibrioides DSM 265 (Prosthecochloris vibrioformis	290318	1753
Francisella tularensis subsp. holarctica	119857	1754
Pediococcus pentosaceus ATCC 25745	278197	1755
Campylobacter jejuni subsp. jejuni 81-176	354242	1758
Thermotoga petrophila RKU-1	390874	1785
Methanocaldococcus jannaschii DSM 2661	243232	1786
Methanococcus maripaludis C7	426368	1788
Methanobrevibacter smithii ATCC 35061	420247	1793
Nitrosopumilus maritimus SCM1	436308	1795
Haemophilus somnus 129PT	205914	1798
Prochlorococcus marinus str. MIT 9312	74546	1810
Finegoldia magna ATCC 29328	334413	1813
Thermotoga sp. RQ2	126740	1819
Leuconostoc citreum KM20	349519	1820
Lactobacillus reuteri JCM 1112	557433	1820
Methanococcus maripaludis C5	402880	1822
Methanococcus maripaludis C6	444158	1826
Campylobacter jejuni RM1221	195099	1838
Lactobacillus fermentum IFO 3956	334390	1843
Nitratiruptor sp. SB155-2	387092	1843
Ehrlichia ruminantium str. Welgevonden	254945	1846
Prochlorococcus marinus str. MIT 9211	93059	1855
Thermotoga maritima MSB8	243274	1858
Lactobacillus acidophilus NCFM	272621	1862
Methanothermobacter thermautotrophicus str. Delta H	187420	1873
Helicobacter hepaticus ATCC 51449	235279	1875
Thermofilum pendens Hrk 5	368408	1876
Thermosipho melanesiensis BI429	391009	1879
Prochlorococcus marinus subsp. marinus str. CCMP1375	167539	1883
Pyrococcus abyssi GE5	272844	1898
Petrotoga mobilis SJ95	403833	1898
Lactobacillus reuteri DSM 20016	557436	1900
Prochlorococcus marinus str. MIT 9515	167542	1906
Prochlorococcus marinus str. MIT 9301	167546	1907
Porphyromonas gingivalis W83	242619	1909
Dictyoglomus thermophilum H-6-12	309799	1912
Francisella philomiragia subsp. philomiragia ATCC 25017	484022	1915
Prochlorococcus marinus str. AS9601	146891	1921
Campylobacter curvus 525.92	360105	1931
Pyrococcus horikoshii OT3	70601	1955
Caldivirga maquilingensis IC-167	397948	1963
Thermoproteus neutrophilus V24Sta	444157	1966
Orientia tsutsugamushi str. Ikeda	334380	1967
Coxiella burnetii RSA 331	360115	1975
Pyrobaculum islandicum DSM 4184	384616	1978
Haemophilus somnus 2336	228400	1980
Prochlorococcus marinus str. MIT 9215	93060	1983
Zymomonas mobilis subsp. mobilis ZM4	264203	1998
Chlorobium chlorochromatii CaD3	340177	2002
Leuconostoc mesenteroides subsp. mesenteroides ATCC 8293	203120	2005
Candidatus Protochlamydia amoebophila UWE25	264201	2031
Thermodesulfovibrio yellowstonii DSM 11347	289376	2033
Thermotoga lettingae TMO	416591	2040
Wolinella succinogenes DSM 1740	273121	2042
Chlorobaculum parvum NCIB 8327	517417	2043
Coxiella burnetii Dugway 5J108-111	434922	2045
Coxiella burnetii RSA 493	227377	2052
Polynucleobacter sp. QLW-P1DMWA-1	312153	2077
Pelodictyon luteolum DSM 273	319225	2083
Porphyromonas gingivalis ATCC 33277	431947	2090
Bartonella tribocorum CIP 105476	382640	2092
Sulfurimonas denitrificans DSM 1251	326298	2096
Corynebacterium jeikeium K411	306537	2120
Pyrococcus furiosus DSM 3638	186497	2125
Pyrobaculum calidifontis JCM 11548	410359	2149
Acidothermus cellulolyticus 11B	351607	2157
Candidatus Desulforudis audaxviator MP104C	477974	2157
Prochlorococcus marinus str. NATL2A	59920	2163
Prochlorococcus marinus str. NATL1A	167555	2193
Thiomicrospira crunogena XCL-2	317025	2196
Thermus thermophilus HB27	262724	2210
Sulfolobus acidocaldarius DSM 639	330779	2223
Thermus thermophilus HB8	300852	2238
Thermoanaerobacter pseudethanolicus ATCC 33223	340099	2243
Chlorobium tepidum TLS	194439	2252
Metallosphaera sedula DSM 5348	399549	2256
Arcobacter butzleri RM4018	367737	2259
Prochlorococcus marinus str. MIT 9313	74547	2269
Methanococcoides burtonii DSM 6242	259564	2273
Propionibacterium acnes KPA171202	267747	2297
Pyrobaculum arsenaticum DSM 13514	340102	2299
Thermococcus kodakarensis KOD1	69014	2306
Synechococcus sp. CC9902	316279	2307
Prosthecochloris aestuarii DSM 271	290512	2327
Thermoanaerobacter sp. X514	399726	2349
Mannheimia succiniciproducens MBEL55E	221988	2369
Halorhodospira halophila SL1	349124	2407
Flavobacterium psychrophilum JIP02/86	402612	2412
Archaeoglobus fulgidus DSM 4304	224325	2420
Chlorobium limicola DSM 245	290315	2434
Granulibacter bethesdensis CGDNIH1	391165	2437
Sulfurovum sp. NBC37-1	387093	2438
Candidatus Methanoregula boonei 6A8	456442	2450
Nitrosomonas europaea ATCC 19718	228410	2461
Moorella thermoacetica ATCC 39073	264732	2465
Chlorobium phaeobacteroides BS1	331678	2469
Methylacidiphilum infernorum V4	481448	2472
Thermosynechococcus elongatus BP-1	197221	2476
Staphylococcus epidermidis ATCC 12228	176280	2485
Methanoculleus marisnigri JR1	368407	2489
Syntrophomonas wolfei subsp. wolfei str. Goettingen	335541	2504
Staphylococcus aureus RF122	273036	2509
Psychrobacter cryohalolentis K5	335284	2511
Staphylococcus saprophyticus subsp. saprophyticus ATCC 15305	342451	2514
Synechococcus sp. WH 8102	84588	2519
Staphylococcus epidermidis RP62A	176279	2526
Synechococcus elongatus PCC 6301	269084	2527
Synechococcus sp. WH 7803	32051	2533
Synechococcus sp. RCC307	316278	2535
Nitrosomonas eutropha C91	335283	2551
Thermoanaerobacter tengcongensis MB4	273068	2588
Staphylococcus aureus subsp. aureus MSSA476	282459	2598
Staphylococcus aureus subsp. aureus USA300	367830	2604
Pyrobaculum aerophilum str. IM2	178306	2605
Staphylococcus aureus subsp. aureus str. Newman	426430	2614
Staphylococcus aureus subsp. aureus COL	93062	2618
Staphylococcus aureus subsp. aureus N315	158879	2619
Carboxydothermus hydrogenoformans Z-2901	246194	2620
Halobacterium sp. NRC-1	64091	2622
Idiomarina loihiensis L2TR	283942	2628
Staphylococcus aureus subsp. aureus MW2	196620	2632
Synechococcus sp. CC9605	110662	2645
Haloquadratum walsbyi DSM 16790	362976	2646
Chlorobium phaeobacteroides DSM 266	290317	2650
Staphylococcus aureus subsp. aureus MRSA252	282458	2656
Synechococcus elongatus PCC 7942	1140	2662
Gluconobacter oxydans 621H	290633	2664
Staphylococcus haemolyticus JCSC1435	279808	2676
Caldicellulosiruptor saccharolyticus DSM 8903	351627	2679
Staphylococcus aureus subsp. aureus USA300_TCH1516	451516	2683
Staphylococcus aureus subsp. aureus Mu3	418127	2698
Pelodictyon phaeoclathratiforme BU-1	324925	2707
Chloroherpeton thalassium ATCC 35110	517418	2710
Staphylococcus aureus subsp. aureus JH9	359786	2726
Staphylococcus aureus subsp. aureus Mu50	158878	2731
Halobacterium salinarum R1	478009	2749
Methylobacillus flagellatus KT	265072	2753
Alcanivorax borkumensis SK2	393595	2755
Synechococcus sp. JA-3-3Ab	321327	2760
Treponema denticola ATCC 35405	243275	2767
Listeria welshimeri serovar 6b str. SLCC5334	386043	2774
Staphylococcus aureus subsp. aureus JH1	359787	2780
Nitrosospira multiformis ATCC 25196	323848	2805
Listeria monocytogenes str. 4b F2365	265669	2821
Natronomonas pharaonis DSM 2160	348780	2822
Sulfolobus tokodaii str. 7	273063	2825
Acidithiobacillus ferrooxidans ATCC 53993	380394	2826
Salinibacter ruber DSM 13855	309807	2833
Alkaliphilus oremlandii OhILAs	350688	2836
Listeria monocytogenes EGD-e	169963	2846
Synechococcus sp. JA-2-3B'a(2-13)	321332	2862
Alkalilimnicola ehrlichei MLHE-1	187272	2865
Leptospira borgpetersenii serovar Hardjo-bovis JB197	355277	2880
Synechococcus sp. CC9311	64471	2892
Staphylococcus aureus subsp. aureus NCTC 8325	93061	2892
Natranaerobius thermophilus JW/NM-WN-LF	457570	2906
Pelotomaculum thermopropionicum SI	370438	2920
Legionella pneumophila str. Lens	297245	2934
Legionella pneumophila subsp. pneumophila str. Philadelphia 1	272624	2942
Leptospira borgpetersenii serovar Hardjo-bovis L550	355276	2945
Methylococcus capsulatus str. Bath	243233	2956
Sulfolobus solfataricus P2	273057	2977
Prochlorococcus marinus str. MIT 9303	59922	2997
Heliobacterium modesticaldum Ice1	498761	3000
Exiguobacterium sibiricum 255-15	262543	3015
Nitrosococcus oceani ATCC 19707	323261	3017
Listeria innocua Clip11262	272626	3043
Deinococcus geothermalis DSM 11300	319795	3062
Maricaulis maris MCS10	394221	3063
Clavibacter michiganensis subsp. michiganensis NCPPB 382	443906	3079
Corynebacterium glutamicum R	340322	3080
uncultured methanogenic archaeon RC-I	351160	3085
Desulfovibrio vulgaris subsp. vulgaris DP4	391774	3091
Thermobifida fusca YX	269800	3110
Clavibacter michiganensis subsp. sepedonicus	31964	3117
Nitrobacter winogradskyi Nb-255	323098	3122
Methanospirillum hungatei JF-1	323259	3139
Rubrobacter xylanophilus DSM 9941	266117	3140
Legionella pneumophila str. Paris	297246	3166
Syntrophus aciditrophicus SB	56780	3168
Deinococcus radiodurans R1	243230	3181
Synechococcus sp. PCC 7002	32049	3186
Clostridium thermocellum ATCC 27405	203119	3189
Sphingopyxis alaskensis RB2256	317655	3195
Legionella pneumophila str. Corby	400673	3206
Desulfotalea psychrophila LSv54	177439	3234
Desulfococcus oleovorans Hxd3	96561	3265
Desulfotomaculum reducens MI-1	349161	3276
Symbiobacterium thermophilum IAM 14863	292459	3338
Pelobacter carbinolicus DSM 2380	338963	3352
Methanosarcina mazei Go1	192952	3370
Clostridium botulinum A str. Hall	441771	3404
Geobacillus thermodenitrificans NG80-2	420246	3445
Geobacter sulfurreducens PCA	243231	3446
Pseudoalteromonas haloplanktis TAC125	326442	3485
Oceanobacillus iheyensis HTE831	221109	3500
Hyphomonas neptunium ATCC 15444	228405	3505
Renibacterium salmoninarum ATCC 33209	288705	3507
Desulfovibrio vulgaris subsp. vulgaris str. Hildenborough	882	3531
Geobacter metallireducens GS-15	269799	3532
Geobacillus kaustophilus HTA426	235909	3540
Psychromonas ingrahamii 37	357804	3545
Clostridium botulinum A str. ATCC 19397	441770	3552
Acidiphilium cryptum JF-5	349163	3559
Synechocystis sp. PCC 6803 (Synechocystis PCC 6803)	1148	3569
Gramella forsetii KT0803	411154	3584
Bdellovibrio bacteriovorus HD100	264462	3587
Clostridium botulinum A str. ATCC 3502	413999	3590
Leptospira biflexa serovar Patoc strain 'Patoc 1 (Ames)'	355278	3600
Methanosarcina barkeri str. Fusaro	269797	3624
Shewanella amazonensis SB2B	326297	3645
Leptospira interrogans serovar Copenhageni str. Fiocruz L1-130	267671	3658
Clostridium botulinum F str. Langeland	441772	3659
Geobacter lovleyi SZ	398767	3685
Bacillus amyloliquefaciens FZB42	326423	3693
Magnetococcus sp. MC-1	156889	3716
Oligotropha carboxidovorans OM5	504832	3722
Leptospira biflexa serovar Patoc strain 'Patoc 1 (Paris)'	456481	3726
Caulobacter crescentus CB15	190650	3737
Desulfovibrio desulfuricans subsp. desulfuricans str. G20	207559	3775
Beijerinckia indica subsp. indica ATCC 9039	395963	3784
Cytophaga hutchinsonii ATCC 33406	269798	3785
Pelobacter propionicus DSM 2379	338966	3804
Vibrio fischeri ES114	312309	3818
Rhodospirillum rubrum ATCC 11170	269796	3841
Clostridium acetobutylicum ATCC 824	272562	3848
Gluconacetobacter diazotrophicus PAl 5	272568	3852
Clostridium botulinum B1 str. Okra	498213	3852
Chloroflexus aurantiacus J-10-fl	324602	3853
Phenylobacterium zucineum HLK1	450851	3854
Shewanella loihica PV-4	323850	3859
Silicibacter sp. TM1040	292414	3864
Clostridium phytofermentans ISDg	357809	3902
Mycobacterium bovis AF2122/97	233413	3920
Shewanella sp. MR-4	60480	3924
Mycobacterium tuberculosis F11	336982	3941
Mycobacterium bovis BCG str. Pasteur 1173P2	410289	3952
Shewanella putrefaciens CN-32	319224	3972
Clostridium botulinum A3 str. Loch Maree	498214	3984
Azoarcus sp. BH72	62928	3989
Mycobacterium tuberculosis H37Rv	83332	3989
Rhodospirillum centenum SW (Rhodocista centenaria SW)	414684	4002
Saccharophagus degradans 2-40	203122	4008
Shewanella sp. MR-7	60481	4014
Geobacter bemidjiensis Bem	404380	4018
Shewanella frigidimarina NCIMB 400	318167	4029
Mycobacterium tuberculosis H37Ra	419947	4034
Vibrio fischeri MJ11	388396	4039
Shewanella sp. W3-18-1	351745	4044
Syntrophobacter fumaroxidans MPOB	335543	4064
Bacillus halodurans C-125	272558	4066
Alteromonas macleodii 'Deep ecotype'	314275	4072
Bacillus clausii KSM-K16	66692	4096
Bacillus subtilis subsp. subtilis str. 168	224308	4105
Roseobacter denitrificans OCh 114	375451	4129
Mycobacterium ulcerans Agy99	362242	4160
Mycobacterium tuberculosis CDC1551	83331	4189
Haloarcula marismortui ATCC 43049	272569	4240
Shewanella pealeana ATCC 700345	398579	4241
Silicibacter pomeroyi DSS-3	246200	4252
Marinobacter aquaeolei VT8	351348	4272
Shewanella halifaxensis HAW-EB4	458817	4278
Pseudoalteromonas atlantica T6c	342610	4281
Jannaschia sp. CCS1	290400	4283
Nitrobacter hamburgensis X14	323097	4326
Roseiflexus castenholzii DSM 13941	383372	4330
Anaeromyxobacter dehalogenans 2CP-C	290397	4346
Mycobacterium avium subsp. paratuberculosis K-10	262316	4350
Geobacter uraniireducens Rf4	351605	4357
Shewanella sp. ANA-3	94122	4360
Leptothrix cholodnii SP-6	395495	4363
Shewanella baltica OS185	402882	4394
Rhodopseudomonas palustris BisB5	316057	4397
Chromobacterium violaceum ATCC 12472	243365	4407
Gloeobacter violaceus PCC 7421	251221	4429
Marinomonas sp. MWYL1	400668	4439
Methylibium petroleiphilum PM1	420662	4449
Trichodesmium erythraeum IMS101	203124	4451
Anaeromyxobacter sp. K	447217	4457
Anaeromyxobacter sp. Fw109-5	404589	4466
Shewanella oneidensis MR-1	211586	4467
Shewanella baltica OS155	325240	4489
Shewanella sediminis HAW-EB3	425104	4497
Frankia sp. CcI3	106370	4499
Arthrobacter sp. FB24	290399	4506
Roseiflexus sp. RS-1	357808	4517
Salinispora tropica CNB-440	369723	4536
Methanosarcina acetivorans C2A	188937	4540
Magnetospirillum magneticum AMB-1	342108	4559
Arthrobacter aurescens TC1	290340	4587
Aromatoleum aromaticum EbN1	76114	4599
Opitutus terrae PB90-1	452637	4612
Alkaliphilus metalliredigens QYMF	293826	4625
Kineococcus radiotolerans SRS30216	266940	4681
Rhodopseudomonas palustris HaA2	316058	4683
Shewanella baltica OS195	399599	4688
Azorhizobium caulinodans ORS 571	438753	4717
Leptospira interrogans serovar Lai str. 56601	189518	4727
Lysinibacillus sphaericus C3-41	444177	4771
Acidobacteria bacterium Ellin345	204669	4777
Bacillus thuringiensis str. Al Hakam	412694	4798
Rhodopseudomonas palustris CGA009	258594	4820
Vibrio parahaemolyticus RIMD 2210633	223926	4832
Rhodopseudomonas palustris BisA53	316055	4878
Shewanella woodyi ATCC 51908	392500	4880
Rhodopseudomonas palustris BisB18	316056	4886
Nocardioides sp. JS614	196162	4909
Colwellia psychrerythraea 34H	167879	4910
Salinispora arenicola CNS-205	391037	4917
Mycobacterium abscessus	36809	4941
Flavobacterium johnsoniae UW101	376686	5017
Xanthobacter autotrophicus Py2	78245	5035
Desulfitobacterium hafniense Y51	138119	5060
Paracoccus denitrificans PD1222	318586	5077
Mycobacterium avium 104	243243	5120
Bacillus thuringiensis serovar konkukian str. 97-27	281309	5197
Rhodopseudomonas palustris TIE-1	395960	5246
Bacillus cereus ATCC 14579	226900	5255
Herpetosiphon aurantiacus ATCC 23779	316274	5278
Bacillus anthracis str. Sterne	260799	5287
Cyanothece sp. ATCC 51142	43989	5304
Bacillus anthracis str. Ames	198094	5311
Sphingomonas wittichii RW1	392499	5345
Caulobacter sp. K31	366602	5438
Mycobacterium marinum M	216594	5452
Mycobacterium gilvum PYR-GCK	350054	5579
Mycobacterium sp. MCS	164756	5615
Bacillus anthracis str. 'Ames Ancestor'	261594	5617
Bacillus cereus E33L	288681	5641
Bacillus weihenstephanensis KBAB4	315730	5653
Anabaena variabilis ATCC 29413 (Anabaena flos-aquae UTEX 1444)	240292	5661
Mycobacterium sp. JLS	164757	5739
Bacillus cereus ATCC 10987	222523	5844
Nocardia farcinica IFM 10152	247156	5936
Mycobacterium sp. KMS	189918	5975
Mycobacterium vanbaalenii PYR-1	350058	5979
Vibrio harveyi ATCC BAA-1116	338187	6040
Corynebacterium glutamicum ATCC 13032	196627	6050
Nostoc sp. PCC 7120 (Anabaena sp. PCC 7120)	103690	6130
Microcystis aeruginosa NIES-843	449447	6312
Nostoc punctiforme PCC 73102 (Nostoc punctiforme ATCC 29133)	63737	6690
Frankia alni ACN14a	326424	6711
Mycobacterium smegmatis str. MC2 155	246196	6716
Bradyrhizobium sp. ORS278	114615	6717
Hahella chejuensis KCTC 2396	349521	6778
Streptomyces griseus subsp. griseus NBRC 13350	455632	7136
Frankia sp. EAN1pec	298653	7191
Saccharopolyspora erythraea NRRL 2338	417290	7197
Rhodopirellula baltica SH 1	243090	7325
Myxococcus xanthus DK 1622	246197	7331
Bradyrhizobium sp. BTAi1	288000	7622
Streptomyces avermitilis MA-4680	227882	7676
Solibacter usitatus Ellin6076	234267	7826
Streptomyces coelicolor A3(2)	100226	8154
Bradyrhizobium japonicum USDA 110	224911	8317
Bacillus licheniformis ATCC 14580 (DSM 13)	279010	8374
Acaryochloris marina MBIC11017	329726	8383
Rhodococcus sp. RHA1	101510	9145
Sorangium cellulosum 'So ce 56'	448385	9384
