# Supplementary material for: Expansion of the Protein Repertoire in Newly Explored Environments: Human Gut Microbiome Specific Protein Families
Source: PLoS Comput Biol. 2010 Jun 3;6(6):e1000798. doi: 10.1371/journal.pcbi.1000798 (PMC2880560; doi:10.1371/journal.pcbi.1000798)
Supplement: Table S3 — The list of 182 curated new families specific to the human gut environment. (0.29 MB XLS) [file pcbi.1000798.s003.xls]

## Sheet: gut_new
Family Id	Hypotheses about function	Number of hits in metagenomic samples of human gut microbiome (HGM)	Number of hits in bacterial genomes from human gut microbiome (HGR) (total number of proteins in HGR is 224099)	Number of hits in bacterial genomes without apparent link to human gut microbiome (HGU) (total number of proteins in HGU is 1423331)	Number of genomes from HGR with at least one hit (total number of HGR genomes is 65)	Number of genomes from HGU with at least one hit (total number of HGU genomes is 493)	"Simple overrepresentation" of a family in HGR (simple ratio between numbers of homologs in HGR and in HGU)	"Expansion" of a family in HGR (increase in # homologs per genome)	"Importance" of a family for HGR organisms (the percentage of HGR genomes which have it minus the percentage of HGU genomes which have it)	First structure from a family solved by PSI	Family - link to FFAS results	Direct link to psi-blast hits in nr85s	psi-blast hits in NR85s+	metagenomic psi-blast hits in NR85s+	Best (lowest) FFAS score in annotated databases of families	gut_new - top (non identical) FFAS hit	gut_new - FFAS score of a top hit	PfamA - FFAS score of a top hit	PDB - FFAS score of a top hit	COG - FFAS score of a top hit	COG category of the top hit	Structure	PSI Center
Family Id	Hypothesis about function	# hits in HG-META	# hits in HGR	# hits in HGU	# HGR genomes hit	# HGU genomes hit	"Overrepresentation" in HGR	"Expansion" in HGR genomes	"Importance" for HGR organisms	First structure from a family solved by PSI	Family - link to FFAS results	Direct link to psi-blast hits in nr85s	psi-blast hits in NR85s+	metagenomic psi-blast hits in NR85s+	Best (lowest) FFAS score in annotated databases of families	gut_new - top (non identical) FFAS hit	gut_new - FFAS score of a top hit	PfamA - FFAS score of a top hit	PDB - FFAS score of a top hit	COG - FFAS score of a top hit	COG category of the top hit	Structure	PSI Center
PB001565	No hypothesis about function	41	41	53	41	24	4.82232	-1.14381	0.582088	N/A	PB001565	psi-blast	28	8	0	.	0	0	0	0	.
HGC00044	Putative glycosyl hydrolase, remote homology to dextranase, polygalacturonase.	209	204	186	44	88	6.92874	2.44345	0.498424	N/A	HGC00044	psi-blast	844	145	-13.3	.	0	-9.79	-13.3	0	.
PB004476	Contains vancomycin b-type resistance proteins vanW, C-terminal domain homologous to L,D-transpeptidase.	28	68	105	37	61	4.07445	0.0959253	0.445499	N/A	PB004476	psi-blast	238	68	-22.4	.	0	0	-22.4	-11.7	[V]
PB000119	Contains ABC transporters, remote homology to predicted membrane proteins	83	129	274	45	129	2.97936	0.696656	0.430644	N/A	PB000119	psi-blast	865	164	-10.9	PB019500	-10.9	-9.92	0	-10.9	[S]
PB001934	Small GTP-binding protein	22	34	45	33	44	4.69448	0	0.418443	N/A	PB001934	psi-blast	95	27	-11.3	.	0	0	-11.3	0	.
PB019388	Domain present in radical SAM domain proteins	23	29	38	29	34	4.7228	-0.119048	0.377188	N/A	PB019388	psi-blast	111	32	0	.	0	0	0	0	.
PB015954	Contains sortases SrtC	60	36	3	23	3	57.1621	0.75	0.347761	N/A	PB015954	psi-blast	98	63	0	.	0	0	0	0	.
PB001030	No hypothesis about function	20	27	36	27	36	4.63477	-0.00868726	0.342362	N/A	PB001030	psi-blast	86	19	0	.	0	0	0	0	.
PB047024	Remote homology to HD domain (PF01966)	42	24	0	22	0	152.432	1.04348	0.338462	N/A	PB047024	psi-blast	47	21	-11.3	PB032103	-10.1	0	-9.83	-11.3	[R]
PB005346	No hypothesis about function	28	30	27	25	25	6.80502	0.115385	0.333905	N/A	PB005346	psi-blast	81	26	0	.	0	0	0	0	.
PB012771	No hypothesis about function	228	92	1	21	1	292.162	3.68182	0.321049	N/A	PB012771	psi-blast	147	100	0	.	0	0	0	0	.
PB003142	Contains putative vacuolar protein sorting-associated protein, present in Eukaryots	17	33	28	24	27	7.2274	0.32	0.314464	N/A	PB003142	psi-blast	71	17	-11.5	.	0	-9.73	0	-11.5	[S]
PB128892	Remote homology to predicted transcriptional regulators	31	22	15	22	15	8.73311	0.0190217	0.308036	N/A	PB128892	psi-blast	62	26	-13.7	PB021816	-88.5	-9.77	-11.8	-13.7	[K]
PB012386	Contains 16S rRNA processing proteins RimM, probably contains zinc finger	24	22	21	22	20	6.35135	-0.0434783	0.297894	N/A	PB012386	psi-blast	9	0	-10.7	.	0	0	-10.7	0	.
PB007486	Contains Peptidoglycan-binding proteins LysM, multiple domains	13	22	22	22	21	6.0752	-0.0434783	0.295865	N/A	PB007486	psi-blast	92	39	0	.	0	0	0	0	.
PB001708	No hypothesis about function	13	22	26	22	26	5.17517	-0.00644122	0.285723	N/A	PB001708	psi-blast	68	26	0	.	0	0	0	0	.
HGC00870	Contains littorine mutase/monooxygenase from Hyoscyamus niger (poisonous plant) no other eukaryotic members ?	22	20	12	20	12	9.77131	0.029304	0.283352	N/A	HGC00870	psi-blast	62	25	0	.	0	0	0	0	.
PB002534	No hypothesis about function, contains phage proteins	22	33	26	20	15	7.76276	-0.0535714	0.277266	N/A	PB002534	psi-blast	132	20	0	.	0	0	0	0	.
PB048420	No hypothesis about function	41	27	0	18	0	171.486	1.42105	0.276923	N/A	PB048420	psi-blast	35	19	0	HGC00877	-49.9	0	0	0	.
PB006154	No hypothesis about function	176	55	10	19	8	31.7567	1.63889	0.276081	N/A	PB006154	psi-blast	137	74	-9.82	HGC00997	-9.58	0	-9.82	0	.
PB019278	Contains transcriptional regulators, has lambda repressor-like DNA-binding domain.	23	19	13	19	11	8.61969	-0.133333	0.269995	N/A	PB019278	psi-blast	96	34	-12.9	HGC00873	-10.4	0	-12.9	0	.
PB076697	Contains many alginate O-acetyltransferases AlgJ	32	38	42	21	31	5.61282	0.414773	0.260197	N/A	PB076697	psi-blast	226	73	0	PB030515	-76.1	0	0	0	.
HGC00166	Homology to predicted transcriptional regulators, remote homology to firmicute plasmid replication protein (RepL) annotated in PfamA.	57	43	233	24	54	1.16713	-2.51636	0.259697	N/A	HGC00166	psi-blast	339	82	-37.2	PB000087	-29.3	0	0	-37.2	[K]
PB003645	Stage III sporulation protein AG	33	23	47	22	43	3.04335	-0.0681818	0.25124	N/A	PB003645	psi-blast	89	26	0	PB048112	-9.78	0	0	0	.
HGC00311	No hypothesis about function	114	35	0	16	0	222.297	2.05882	0.246154	N/A	HGC00311	psi-blast	37	26	0	PB178269	-45.7	0	0	0	.
PB046158	No hypothesis about function	146	42	3	16	3	66.6892	1.72059	0.240069	N/A	PB046158	psi-blast	100	67	0	PB162028	-25.9	0	0	0	.
PB009661	Branch of glutaredoxins	32	23	3	16	3	36.5203	0.602941	0.240069	2obb_A_12/18/06_MCSG	PB009661
PB000716	DNA-damage-inducible protein D	20	20	28	18	21	4.38024	-0.220096	0.234327	N/A	PB000716	psi-blast	78	23	0	.	0	0	0	0	.
HGC00374	Annotated in COG as virulence protein but function unknown	41	32	57	21	45	3.50419	0.215415	0.231799	N/A	HGC00374	psi-blast	173	60	-85.9	PB000142	-76	0	0	-85.9	[R]
HGC00150	No hypothesis about function	83	31	0	15	0	196.892	1.9375	0.230769	N/A	HGC00150	psi-blast	36	23	0	.	0	0	0	0	.
PB001572	Contains 4Fe-4S ferredoxin iron-sulfur binding domain proteins	36	24	57	21	53	2.62814	0.0353535	0.215572	N/A	PB001572	psi-blast	94	15	0	.	0	0	0	0	.
PB004588	No hypothesis about function	63	105	0	14	0	666.892	7	0.215385	N/A	PB004588	psi-blast	228	115	0	PB015612	-17.6	0	0	0	.
HGC00683	Putative calcium-regulated periplasmic protein of unknown function solved by JCSG	38	64	13	15	8	29.0347	2.55556	0.214542	3due_A_07/17/08_JCSG	HGC00683	psi-blast	110	44	-33.2	PB000136	-42.9	0	-33.2	-16.2	[S]	3DUE	JCSG
PB162065	No hypothesis about function	11	14	1	14	1	44.4594	0.433333	0.213356	N/A	PB162065	psi-blast	34	20	0	.	0	0	0	0	.
PB013946	No hypothesis about function	45	29	13	15	9	13.1564	0.5125	0.212514	N/A	PB013946	psi-blast	110	35	0	PB022815	-40.7	0	0	0	.
PB025553	No hypothesis about function	16	14	2	14	2	29.6396	0.266667	0.211328	N/A	PB025553	psi-blast	20	10	0	.	0	0	0	0	.
PB030138	No hypothesis about function	24	14	2	14	2	29.6396	0.266667	0.211328	N/A	PB030138	psi-blast	18	9	0	.	0	0	0	0	.
PB005684	Contains membrane proteins, remote homology to components of DNA replication licensing factors, contains p-loop ATP-ase domain.	21	46	52	19	40	5.51249	1.03171	0.211172	N/A	PB005684	psi-blast	266	70	-12.1	.	0	-9.6	-10.2	-12.1	[L]
PB002589	No hypothesis about function	12	15	10	15	10	8.66093	0.0284091	0.210485	N/A	PB002589	psi-blast	113	34	0	.	0	0	0	0	.
PB004996	Contains ATP-dependent exoDNAse (exonuclease V)	26	15	10	15	10	8.66093	0.0284091	0.210485	N/A	PB004996	psi-blast	33	9	0	.	0	0	0	0	.
PB011051	No hypothesis about function	22	14	3	14	3	22.2297	0.183333	0.209299	N/A	PB011051	psi-blast	52	13	0	PB165884	-84.7	0	0	0	.
PB033130	Possible transglutaminase-family protein, remotely related to bacterial Ig-like domain (group 1)	14	14	3	14	3	22.2297	0.183333	0.209299	3e8v_A_08/20/08_NYSGXRC	PB033130
PB009671	Putative calcium-regulated periplasmic protein of unknown function solved by JCSG	45	33	9	14	4	20.9595	0.4	0.207271	3due_A_07/17/08_JCSG	PB009671	psi-blast	50	15	-15.9	HGC00683	-13.6	0	-15.9	-11.1	[S]	3DUE	JCSG
PB022815	Contains proteins related to phages	40	29	16	15	12	10.8347	0.581731	0.206428	N/A	PB022815	psi-blast	125	40	0	PB013946	-40.7	0	0	0	.
PB014033	No hypothesis about function	24	18	5	14	5	19.054	0.366667	0.205243	N/A	PB014033	psi-blast	32	12	0	.	0	0	0	0	.
PB006101	No hypothesis about function	18	17	5	14	5	17.9955	0.3	0.205243	N/A	PB006101	psi-blast	112	24	0	.	0	0	0	0	.
HGC00928	Contains putative stress-responsive transcriptional regulators	13	15	5	14	5	15.8784	0.166667	0.205243	N/A	HGC00928	psi-blast	67	18	0	.	0	0	0	0	.
PB007733	No hypothesis about function	18	14	5	14	5	14.8198	0.1	0.205243	N/A	PB007733	psi-blast	67	19	0	.	0	0	0	0	.
HGC00024	N-terminal subdomain of SusD	463	819	56	14	6	91.2589	46.6	0.203214	3ejn_A_09/18/08_JCSG	HGC00024	psi-blast	903	233	-61.4	PB001404	-52.9	0	-61.4	0	.	3CGH	JCSG
PB011130	N-terminal domain often followed by phage shock protein C (PspC/PF04024) that is thought to be a transcriptional regulator	15	16	6	14	6	14.5174	0.209524	0.203214	N/A	PB011130	psi-blast	61	13	0	.	0	0	0	0	.
PB007843	No hypothesis about function	21	14	6	14	6	12.7027	0.0761905	0.203214	N/A	PB007843	psi-blast	73	17	0	.	0	0	0	0	.
PB012108	N-terminal domain found in metallopeptidases	15	14	6	14	6	12.7027	0.0761905	0.203214	N/A	PB012108	psi-blast	91	13	0	PB067216	-82	0	0	0	.
PB067216	N-terminal domain found in metallopeptidases	15	14	6	14	6	12.7027	0.0761905	0.203214	N/A	PB067216	psi-blast	91	13	0	PB012108	-82	0	0	0	.
PB017610	Contains possible chromosome segregation ATPases, remote homology to filamins from immunoglobulin fold	16	14	12	14	6	6.83991	-0.780952	0.203214	N/A	PB017610	psi-blast	66	14	-10.3	.	0	0	-10.3	0	.
PB001232	No hypothesis about function	18	39	17	14	7	13.7613	0.475	0.201186	N/A	PB001232	psi-blast	205	69	0	PB010126	-23.4	0	0	0	.
PB007147	No hypothesis about function	23	14	7	14	7	11.1149	0.0583333	0.201186	N/A	PB007147	psi-blast	75	19	0	.	0	0	0	0	.
PB009233	Contains putative gliding motility proteins	16	14	7	14	7	11.1149	0.0583333	0.201186	N/A	PB009233	psi-blast	98	26	0	PB048846	-10.2	0	0	0	.
PB064361	Contains putative lipoproteins	43	60	0	13	0	381.081	4.28571	0.2	N/A	PB064361	psi-blast	265	91	0	PB004588	-12.1	0	0	0	.
PB008694	Contains conserved hypothetical proteins found in conjugate transposon TraH.	45	40	0	13	0	254.054	2.85714	0.2	N/A	PB008694	psi-blast	26	14	-10.7	.	0	0	0	-10.7	[S]
PB023339	No hypothesis about function	54	32	0	13	0	203.243	2.28571	0.2	N/A	PB023339	psi-blast	34	16	0	.	0	0	0	0	.
PB029229	No hypothesis about function	45	28	0	13	0	177.838	2	0.2	N/A	PB029229	psi-blast	35	21	0	PB027554	-10.8	0	0	0	.
PB019279	Remote homology to WWE Domain of Deltex from D.melanogaster ?	21	21	0	13	0	133.378	1.5	0.2	N/A	PB019279	psi-blast	27	13	-10.4	HGC00919	-16	0	-10.4	0	.
PB034180	No hypothesis about function	14	15	0	13	0	95.2702	1.07143	0.2	N/A	PB034180	psi-blast	19	9	0	.	0	0	0	0	.
PB032818	No hypothesis about function	18	13	0	13	0	82.5675	0.928571	0.2	N/A	PB032818	psi-blast	14	8	0	.	0	0	0	0	.
PB047496	No hypothesis about function	18	13	0	13	0	82.5675	0.928571	0.2	N/A	PB047496	psi-blast	16	9	0	HGC00919	-10.6	0	0	0	.
HGC00106	Contains putative TonB-linked outer membrane proteins, part of SusC ?	667	908	76	14	8	74.8964	52.0889	0.199157	N/A	HGC00106	psi-blast	927	288	0	.	0	0	0	0	.
HGC00248	Domain found in virulence-associated E family proteins, predicted p-loop ATP-ases and phage proteins	67	32	34	17	31	5.80695	0.715278	0.198658	N/A	HGC00248	psi-blast	128	35	0	PB007535	-26.6	0	0	0	.
PB015266	No hypothesis about function	39	32	2	13	2	67.7477	1.61905	0.195943	3fyf_A_01/22/09_NYSGXRC	PB015266
PB011023	Contains conserved proteins found in conjugate transposon TraQ	50	35	4	13	2	44.4594	1.16667	0.195943	N/A	PB011023	psi-blast	34	22	0	.	0	0	0	0	.
HGC00915	No hypothesis about function	12	13	2	13	2	27.5225	0.261905	0.195943	N/A	HGC00915	psi-blast	28	13	0	.	0	0	0	0	.
HGC01056	Contains branched-chain amino acid aminotransferases, remote homology to FKBP-type peptidyl-prolyl cis-trans isomerases	14	13	2	13	2	27.5225	0.261905	0.195943	N/A	HGC01056	psi-blast	101	18	-13.7	HGC01064	-11.5	0	-10.1	-13.7	[O]
PB023890	Domain of an uncharacterized protein PG_1388 from Porphyromonas gingivalis W83	19	13	2	13	2	27.5225	0.261905	0.195943	2p3p_A_03/09/07_MCSG	PB023890
PB023890	Domain of an uncharacterized protein PG_1388 from Porphyromonas gingivalis W83 (solved by MCSG)	19	13	2	13	2	27.5225	0.261905	0.195943	N/A	PB023890	psi-blast	21	11	-108	.	0	0	-108	0	.	2P3P	MCSG
PB027498	No hypothesis about function	24	13	2	13	2	27.5225	0.261905	0.195943	N/A	PB027498	psi-blast	15	8	0	.	0	0	0	0	.
PB027778	No hypothesis about function	19	13	2	13	2	27.5225	0.261905	0.195943	N/A	PB027778	psi-blast	12	6	0	.	0	0	0	0	.
PB044822	No hypothesis about function	15	13	2	13	2	27.5225	0.261905	0.195943	N/A	PB044822	psi-blast	16	8	0	.	0	0	0	0	.
PB053244	No hypothesis about function	21	13	2	13	2	27.5225	0.261905	0.195943	N/A	PB053244	psi-blast	20	13	0	.	0	0	0	0	.
PB060121	Contains topoisomerases	52	50	4	13	3	63.5135	2.57143	0.193915	N/A	PB060121	psi-blast	58	31	0	HGC00553	-35.4	0	0	0	.
PB034883	Contains integrases	43	54	14	14	11	22.8649	2.43333	0.193072	N/A	PB034883	psi-blast	167	57	0	HGC00015	-33.9	0	0	0	.
PB000790	Branch of SusD family	82	98	17	13	4	34.5796	3.6	0.191886	3cgh_A_03/05/08_JCSG	PB000790
PB012954	Contains conserved hypothetical TraN-like proteins found in conjugate transposon	79	51	8	13	4	35.991	2.04286	0.191886	N/A	PB012954	psi-blast	54	29	0	PB014120	-113	0	0	0	.
PB014120	Contains conserved hypothetical TraN-like proteins found in conjugate transposon	74	51	8	13	4	35.991	2.04286	0.191886	N/A	PB014120	psi-blast	54	29	0	PB012954	-113	0	0	0	.
PB015879	Contains putative glycosyl hydrolases	31	20	7	13	4	15.8784	0.0285714	0.191886	N/A	PB015879	psi-blast	43	19	0	PB057370	-46	0	0	0	.
PB006791	No hypothesis about function	29	16	27	16	27	3.62934	-0.0231092	0.191387	N/A	PB006791	psi-blast	80	36	0	.	0	0	0	0	.
PB001404	Branch of SusD family	415	764	61	13	5	78.265	44.4048	0.189858	3cgh_A_03/05/08_JCSG	PB001404
HGC01024	No hypothesis about function, two domains	13	13	6	13	6	11.7954	0.0714286	0.18783	N/A	HGC01024	psi-blast	79	23	0	.	0	0	0	0	.
PB004718	No hypothesis about function	17	13	6	13	6	11.7954	0.0714286	0.18783	N/A	PB004718	psi-blast	18	10	0	.	0	0	0	0	.
PB002770	No hypothesis about function, mutliple domains	41	28	16	14	14	10.461	0.8	0.186987	N/A	PB002770	psi-blast	95	43	0	.	0	0	0	0	.
PB022506	No hypothesis about function	20	13	7	13	7	10.3209	0.0535714	0.185801	N/A	PB022506	psi-blast	87	22	0	.	0	0	0	0	.
PB045072	No hypothesis about function	18	15	0	12	0	95.2702	1.15385	0.184615	N/A	PB045072	psi-blast	17	7	0	.	0	0	0	0	.
PB069407	No hypothesis about function, multiple domains	20	18	8	13	8	12.7027	0.396825	0.183773	N/A	PB069407	psi-blast	27	14	-9.45	.	0	0	0	-9.45	[S]
PB035451	No hypothesis about function	28	16	8	13	8	11.2913	0.253968	0.183773	N/A	PB035451	psi-blast	48	21	0	.	0	0	0	0	.
PB007011	Contains abortive phage resistance proteins	23	18	16	14	16	6.72496	0.258824	0.18293	N/A	PB007011	psi-blast	85	32	0	.	0	0	0	0	.
PB017124	Contains putative cell surface proteins, multiple domains	20	24	1	12	1	76.2162	1.34615	0.182587	N/A	PB017124	psi-blast	48	15	0	.	0	0	0	0	.
PB008806	Contains mobilization proteins BmpH	30	22	1	12	1	69.8648	1.19231	0.182587	N/A	PB008806	psi-blast	26	10	0	.	0	0	0	0	.
PB062605	Contains conserved hypothetical proteins found in conjugate transposon TraL.	32	28	2	12	1	59.2793	1.15385	0.182587	N/A	PB062605	psi-blast	26	15	0	PB037455	-48	0	0	0	.
HGC00690	Contains stage V sporulation proteins AB	14	14	18	14	17	4.67994	-0.0666667	0.180902	N/A	HGC00690	psi-blast	40	14	0	.	0	0	0	0	.
PB009534	Contains stage V sporulation proteins AA	15	14	18	14	17	4.67994	-0.0666667	0.180902	N/A	PB009534	psi-blast	45	18	0	.	0	0	0	0	.
PB018258	No hypothesis about function	36	32	3	12	2	50.8108	1.46154	0.180559	N/A	PB018258	psi-blast	50	24	0	.	0	0	0	0	.
PB002794	Remote homology to predicted RNA-binding proteins, contains TPR repeat.	16	14	18	14	18	4.67994	-0.0140351	0.178873	N/A	PB002794	psi-blast	111	19	-11.5	.	0	0	0	-11.5	[S]
PB010473	Contains conserved proteins found in conjugate transposon TraF	42	36	5	12	3	38.1081	1.51923	0.17853	N/A	PB010473	psi-blast	31	15	0	PB080926	-15.7	0	0	0	.
PB007740	Homology to nickel and cobalt resistance protein cnrR	25	21	15	13	11	8.33615	0.25	0.177688	N/A	PB007740	psi-blast	81	28	-16	HGC00779	-9.72	0	-12.1	-16	[UNTP]
PB042013	No hypothesis about function, contains protein annotated as TonB	20	15	0	11	0	95.2702	1.25	0.169231	N/A	PB042013	psi-blast	13	4	0	PB083081	-9.78	0	0	0	.
HGC00672	No hypothesis about function	14	11	0	11	0	69.8648	0.916667	0.169231	N/A	HGC00672	psi-blast	9	3	0	.	0	0	0	0	.
HGC00762	No hypothesis about function	14	11	0	11	0	69.8648	0.916667	0.169231	N/A	HGC00762	psi-blast	13	8	-9.73	.	0	-9.73	0	0	.
HGC00947	No hypothesis about function	12	11	0	11	0	69.8648	0.916667	0.169231	N/A	HGC00947	psi-blast	71	14	0	HGC00919	-12.3	0	0	0	.
PB022697	No hypothesis about function	17	11	0	11	0	69.8648	0.916667	0.169231	N/A	PB022697	psi-blast	51	17	0	.	0	0	0	0	.
PB040621	Contains exported proteins	16	11	0	11	0	69.8648	0.916667	0.169231	N/A	PB040621	psi-blast	11	5	0	HGC00929	-10.7	0	0	0	.
PB044572	No hypothesis about function, contains transmembrane proteins	15	11	0	11	0	69.8648	0.916667	0.169231	N/A	PB044572	psi-blast	17	11	0	.	0	0	0	0	.
PB044863	No hypothesis about function	22	11	0	11	0	69.8648	0.916667	0.169231	N/A	PB044863	psi-blast	7	4	0	.	0	0	0	0	.
PB045813	No hypothesis about function, at least two domains	17	11	0	11	0	69.8648	0.916667	0.169231	N/A	PB045813	psi-blast	23	2	0	.	0	0	0	0	.
PB048276	No hypothesis about function	14	11	0	11	0	69.8648	0.916667	0.169231	N/A	PB048276	psi-blast	17	12	0	.	0	0	0	0	.
PB144506	N-terminal domain often followed by phage shock protein C (PspC/PF04024) that is thought to be a transcriptional regulator	34	37	56	16	38	4.12281	0.740573	0.169075	N/A	PB144506	psi-blast	304	79	-10.7	PB001516	-39.5	0	0	-10.7	[S]
PB019827	Remote homology to transmebrane long-chain fatty acid transport protein FadL	23	13	17	13	16	4.58709	-0.0714286	0.167546	N/A	PB019827	psi-blast	62	21	-12.8	.	0	0	-10.7	-12.8	[M]
PB031792	Contains flavodoxins	29	11	4	11	4	13.973	0.116667	0.161117	N/A	PB031792	psi-blast	40	22	0	.	0	0	0	0	.
PB037276	Contains transcriptional regulators from AraC family	26	27	20	12	12	8.16602	0.538462	0.160275	N/A	PB037276	psi-blast	75	31	0	.	0	0	0	0	.
PB014998	Contains adenylosuccinate lyases, HEAT repeat	12	11	5	11	5	11.6441	0.0833333	0.159089	N/A	PB014998	psi-blast	45	13	-11.3	.	0	0	-11.3	-10.8	[U]
PB002104	Contains ABC-type multidrug transport system, ATPase and permease components	19	13	23	13	21	3.44031	-0.116883	0.157404	N/A	PB002104	psi-blast	47	12	0	.	0	0	0	0	.
HGC00164	Homology to uncharacterized protein related to capsule biosynthesis enzymes.	47	34	119	21	83	1.79955	0.128788	0.15472	N/A	HGC00164	psi-blast	461	91	-42	PB170059	-32.3	0	0	-42	[R]
PB053359	Annotated in COG but function unknown	29	29	15	12	15	11.5118	1.29327	0.154189	N/A	PB053359	psi-blast	109	27	-58.6	.	0	0	0	-58.6	[S]
PB012823	No hypothesis about function, two domains	23	24	0	10	0	152.432	2.18182	0.153846	N/A	PB012823	psi-blast	27	13	0	.	0	0	0	0	.
HGC00579	Related to porins. Present in Fe transporters, TonB.	24	22	0	10	0	139.73	2	0.153846	N/A	HGC00579	psi-blast	48	32	-10.3	HGC00908	-17	0	-9.97	-10.3	[M]
PB083081	Remote homology to Rhamnogalacturonase from Starch-binding domain-like fold	13	18	0	10	0	114.324	1.63636	0.153846	N/A	PB083081	psi-blast	25	9	-12.3	PB109275	-10.7	0	0	-12.3	[S]
PB038151	No hypothesis about function, contains transmembrane proteins, histidine kinase	18	11	0	10	0	69.8648	1	0.153846	N/A	PB038151	psi-blast	16	7	0	.	0	0	0	0	.
HGC00965	No hypothesis about function	23	10	0	10	0	63.5135	0.909091	0.153846	N/A	HGC00965	psi-blast	31	18	0	.	0	0	0	0	.
PB062763	Contains conserved hypothetical proteins found in conjugate transposon TraD. Psi-blast hit to putative metalloendopeptidase from Plasmodium.	30	26	2	10	2	55.045	1.69697	0.149789	N/A	PB062763	psi-blast	41	26	0	PB003564	-103	0	0	0	.
HGC00267	No hypothesis about function	78	18	7	10	4	14.2905	0.236364	0.145733	N/A	HGC00267	psi-blast	86	51	0	.	0	0	0	0	.
HGC00522	No hypothesis about function	20	10	4	10	4	12.7027	0.109091	0.145733	N/A	HGC00522	psi-blast	15	3	0	.	0	0	0	0	.
PB001823	No hypothesis about function	18	44	24	11	14	11.1784	2.06667	0.140833	N/A	PB001823	psi-blast	86	18	0	PB009052	-15.3	0	0	0	.
HGC00422	No hypothesis about function, multiple domains, remote link to defensins ?	45	16	0	9	0	101.622	1.6	0.138462	N/A	HGC00422	psi-blast	53	40	-9.61	.	0	0	-9.61	0	.
HGC01215	No hypothesis about function	20	15	0	9	0	95.2702	1.5	0.138462	N/A	HGC01215	psi-blast	21	9	0	.	0	0	0	0	.
PB044380	No hypothesis about function	16	10	0	9	0	63.5135	1	0.138462	N/A	PB044380	psi-blast	10	6	0	PB003564	-39.6	0	0	0	.
PB028090	Contains integral membrane proteins	11	10	12	10	9	4.88565	-0.290909	0.135591	N/A	PB028090	psi-blast	30	11	0	.	0	0	0	0	.
PB036876	No hypothesis about function	30	20	6	9	2	18.1467	0	0.134405	N/A	PB036876	psi-blast	37	24	0	.	0	0	0	0	.
PB008434	No hypothesis about function	18	11	10	10	10	6.35135	0.0909091	0.133562	N/A	PB008434	psi-blast	47	12	0	.	0	0	0	0	.
HGC00787	Contains putative helicases, present in mammals, probably transcription elongation factor	14	13	34	13	34	2.35907	-0.0428571	0.131034	N/A	HGC00787	psi-blast	198	19	0	.	0	0	0	0	.
HGC00991	No hypothesis about function	19	16	29	11	19	3.38739	-0.116667	0.130691	N/A	HGC00991	psi-blast	26	7	0	.	0	0	0	0	.
HGC00509	No hypothesis about function	16	12	0	8	0	76.2162	1.33333	0.123077	N/A	HGC00509	psi-blast	5	2	0	PB178269	-14.5	0	0	0	.
HGC00593	Remote homology to TRAP-type mannitol/chloroaromatic compound transport system, small permease component.	16	8	0	8	0	50.8108	0.888889	0.123077	N/A	HGC00593	psi-blast	11	6	-9.52	.	0	0	0	-9.52	[Q]
HGC00789	No hypothesis about function	12	8	0	8	0	50.8108	0.888889	0.123077	N/A	HGC00789	psi-blast	9	4	0	.	0	0	0	0	.
HGC00921	No hypothesis about function	14	8	0	8	0	50.8108	0.888889	0.123077	N/A	HGC00921	psi-blast	7	3	0	.	0	0	0	0	.
PB012472	No hypothesis about function	12	11	25	11	25	2.68711	-0.0448718	0.118521	N/A	PB012472	psi-blast	59	16	0	.	0	0	0	0	.
PB009510	Contains phage proteins, homology to bacteriophage P2-related tail formation protein	17	12	16	9	11	4.48331	-0.133333	0.116149	N/A	PB009510	psi-blast	169	31	-29.1	.	0	0	0	-29.1	[S]
PB000821	No hypothesis about function	19	19	103	18	80	1.16034	-0.271605	0.114651	N/A	PB000821	psi-blast	8	0	0	.	0	0	0	0	.
PB006933	Contains putative transposon proteins and secreted proteins	16	20	14	9	12	8.46847	0.923077	0.114121	N/A	PB006933	psi-blast	41	10	0	.	0	0	0	0	.
PB012991	No hypothesis about function	16	9	15	9	13	3.57263	-0.171429	0.112092	N/A	PB012991	psi-blast	38	12	0	.	0	0	0	0	.
HGC00518	Remote homology to nickel responsive regulators	24	13	55	12	36	1.47442	-0.486486	0.111593	N/A	HGC00518	psi-blast	165	40	-17.1	.	0	0	-11.7	-17.1	[S]
PB006205	Contains conjugative transposon membrane proteins	20	16	6	8	6	14.5174	0.920635	0.110907	N/A	PB006205	psi-blast	27	6	0	.	0	0	0	0	.
PB021443	No hypothesis about function	31	18	13	8	7	8.16602	0.375	0.108878	N/A	PB021443	psi-blast	86	26	0	.	0	0	0	0	.
PB034679	No hypothesis about function	14	9	0	7	0	57.1621	1.125	0.107692	N/A	PB034679	psi-blast	19	12	0	.	0	0	0	0	.
HGC00993	No hypothesis about function	11	7	0	7	0	44.4594	0.875	0.107692	N/A	HGC00993	psi-blast	8	3	0	.	0	0	0	0	.
PB071107	No hypothesis about function	16	7	0	7	0	44.4594	0.875	0.107692	N/A	PB071107	psi-blast	12	8	0	.	0	0	0	0	.
PB021133	Clindamycin resistance transfer factor BtgB, remote homology to Relaxase/Mobilisation nuclease domain	19	9	1	7	1	28.5811	0.625	0.105664	N/A	PB021133	psi-blast	26	13	-9.9	HGC00170	-10.8	-9.9	0	0	.
PB039305	No hypothesis about function	23	9	3	7	2	14.2905	0.125	0.103636	N/A	PB039305	psi-blast	31	19	0	.	0	0	0	0	.
PB003564	Contains conserved hypothetical proteins found in conjugate transposon TraD.	21	28	36	11	34	4.80643	1.30476	0.100265	N/A	PB003564	psi-blast	40	26	0	PB062763	-103	0	0	0	.
PB048631	Contains glycosyl hydrolases, homology to oligoxyloglucan reducing end-specific cellobiohydrolase, can be linked to PfamA family of fungal fucose-specific lectins.	17	15	124	14	57	0.762162	-1.13793	0.099766	N/A	PB048631	psi-blast	848	179	-30.2	PB000005	-17.7	0	-27.3	-30.2	[R]	3B7F	JCSG
PB155142	Contains putative TonB-linked outer membrane proteins, part of SusC ? Remote homology to several outer membrane receptors	508	930	158	14	58	37.1494	59.322	0.0977376	N/A	PB155142	psi-blast	967	245	-13	PB042841	-41.4	0	-13	-11.6	[P]
PB092941	Contains transposases	21	23	0	6	0	146.081	3.28571	0.0923077	N/A	PB092941	psi-blast	14	6	0	.	0	0	0	0	.
PB177066	No hypothesis about function	22	9	0	6	0	57.1621	1.28571	0.0923077	N/A	PB177066	psi-blast	22	13	0	.	0	0	0	0	.
PB001025	Homology to predicted transcriptional regulators, remote homology to firmicute plasmid replication protein (RepL) annotated in PfamA.	22	14	68	13	54	1.28868	-0.236364	0.0904665	N/A	PB001025	psi-blast	300	61	-41.9	HGC00166	-18.2	0	-12.5	-41.9	[K]
PB078508	No hypothesis about function	15	10	2	6	2	21.1712	0.761905	0.0882509	N/A	PB078508	psi-blast	23	13	0	.	0	0	0	0	.
HGC00857	Contains transposases and their inactivated derivatives, consistent with remote homology	15	26	21	6	4	7.50614	-0.485714	0.0841941	N/A	HGC00857	psi-blast	75	39	-15.8	.	0	0	0	-15.8	[L]
PB202086	Remote homology to Flagellar basal body-associated protein.	46	21	0	5	0	133.378	3.5	0.0769231	N/A	PB202086	psi-blast	37	26	-10.6	.	0	0	0	-10.6	[N]
PB162020	Contains plasmid recombination enzyme (Mobilization protei n)	29	7	0	5	0	44.4594	1.16667	0.0769231	N/A	PB162020	psi-blast	17	12	0	.	0	0	0	0	.
HGC00485	Remote homology to lysozyme	20	6	0	5	0	38.1081	1	0.0769231	N/A	HGC00485	psi-blast	9	6	-11.4	.	0	-9.79	-11.4	0	.
PB053138	No hypothesis about function	18	15	11	6	8	7.93919	0.920635	0.0760805	N/A	PB053138	psi-blast	50	20	0	PB009406	-31.1	0	0	0	.
HGC00573	No hypothesis about function	18	7	1	5	1	22.2297	0.666667	0.0748947	N/A	HGC00573	psi-blast	13	9	0	.	0	0	0	0	.
HGC01179	Remote homology to Flp pilus assembly protein TadG.	13	9	2	5	2	19.054	0.833333	0.0728663	N/A	HGC01179	psi-blast	16	5	-12.7	.	0	0	0	-12.7	[U]
HGC00803	No hypothesis about function	14	6	4	5	4	7.62162	0.2	0.0688095	N/A	HGC00803	psi-blast	12	4	0	.	0	0	0	0	.
PB038401	No hypothesis about function	15	6	5	5	5	6.35135	0.166667	0.0667811	N/A	PB038401	psi-blast	26	11	0	.	0	0	0	0	.
PB032242	Contains permeases	15	8	7	5	5	6.35135	0.166667	0.0667811	N/A	PB032242	psi-blast	34	15	0	.	0	0	0	0	.
PB050904	No hypothesis about function	24	7	0	4	0	44.4594	1.4	0.0615385	N/A	PB050904	psi-blast	10	4	0	.	0	0	0	0	.
HGC00429	No hypothesis about function	26	6	0	4	0	38.1081	1.2	0.0615385	N/A	HGC00429	psi-blast	23	15	0	.	0	0	0	0	.
HGC00878	No hypothesis about function	12	6	1	4	1	19.054	0.7	0.0595101	N/A	HGC00878	psi-blast	6	3	0	.	0	0	0	0	.
HGC00962	Remote homology to N-terminal domain of nickel responsive regulators NikR	19	9	4	4	2	11.4324	0.466667	0.0574817	N/A	HGC00962	psi-blast	36	20	-12.3	.	0	0	-12.3	-10.7	[K]
HGC00816	Contains Type IV secretory pathway, VirB4 components	16	8	4	4	2	10.1622	0.266667	0.0574817	N/A	HGC00816	psi-blast	197	81	-9.75	PB008196	-43.9	-9.75	0	0	.
HGC00933	No hypothesis about function	13	6	5	4	5	6.35135	0.366667	0.0513965	N/A	HGC00933	psi-blast	18	3	0	.	0	0	0	0	.
HGC00552	No hypothesis about function	15	6	1	3	1	19.054	1	0.0441254	N/A	HGC00552	psi-blast	15	6	-9.53	.	0	-9.53	0	0	.
PB002776	No hypothesis about function	17	10	59	9	47	1.05856	-0.229167	0.0431269	N/A	PB002776	psi-blast	182	33	0	.	0	0	0	0	.
PB000795	Contains vacuolar alpha mannosidases, remote homology to Galactose-binding domain-like fold, eukaryotic members	18	10	41	6	37	1.51223	0.349624	0.017257	N/A	PB000795	psi-blast	117	19	0	.	0	0	0	0	.
HGC00711	Remote homology to predicted membrane proteins	15	6	38	6	37	0.977131	-0.142857	0.017257	N/A	HGC00711	psi-blast	19	11	-13.5	.	0	0	0	-13.5	[S]
HGC01213	No hypothesis about function	14	6	41	6	40	0.907336	-0.142857	0.0111718	N/A	HGC01213	psi-blast	47	8	0	.	0	0	0	0	.
PB000520	No hypothesis about function	13	11	91	11	79	0.7594	-0.220833	0.00898736	N/A	PB000520	psi-blast	199	26	0	.	0	0	0	0	.
